# Supplementary material
Source: PubMed Central journal article supplement (PMC3234844)
Supplement: supp_M111.248641_jbc.M111.248641-1.pdf [file supp_M111.248641_jbc.M111.248641-1.pdf]

## SUPPLEMENTAL MATERIAL

### TABLES

**Table S1. Ramachandran scores for TC-1 and TC-1 variants**

| Ramachandran (%)   | TC-1 | TC-1 G13K | all other substitutions |
|--------------------|------|-----------|-------------------------|
| most favored       | 91.1 | 87.7      | 87.5                    |
| additional allowed | 8.9  | 12.3      | 12.5                    |
| generously allowed | 0    | 0         | 0                       |
| disallowed         | 0    | 0         | 0                       |

**Table S2. Sequences of forward (f) and reverse (r) primers used to construct TC-1 substitution variants.** Restriction sites for cloning are underlined and substituted residues are shown in bold.

| Primer name    | sequence (5'-3')                                                                                                       |
|----------------|------------------------------------------------------------------------------------------------------------------------|
| PKPET S12K (f) | GTGTAAC <u>CATATGGCTGAACTCCGCTGCATGTGTATAAAGACAACCAAG</u><br>GGAATTCATCCCAAAAAC                                        |
| PKPET G13K (f) | GTGTAAC <u>CATATGGCTGAACTCCGCTGCATGTGTATAAAGACAACCTCTA</u><br>AAATTCATCCCAAAAACATCC                                    |
| PKPET I14K (f) | GTGTAAC <u>CATATGGCTGAACTCCGCTGCATGTGTATAAAGACAACCTCTG</u><br>GAAAGCATCCCAAAAACATCC                                    |
| PKPET K17A (f) | GTGTAAC <u>CATATGGCTGAACTCCGCTGCATGTGTATAAAGACAACCTCTG</u><br>GAATTCATCCCGCAAACATCCAAAGTTTGG                           |
| PKPET D42K (r) | TATAGGATCCTCAAGATTCATCACCTGCCAATTTTTTCTGTACAATTTTC<br>TTGATTCTGGGAGCATCTGGGTCCAGGCAGATTTTCCTCCCCTTCTTCA<br>GTGTGGCTATC |
| PKPET D49K (r) | TATAGGATCCTCAAGATTCATCACCTGCCAATTTTTTCTGTACAATTTTC<br>TTGATTCTGGGAGCATCTGGCTTCAGGCAGATTTTCCTC                          |
| PKPET-1 (r)    | GTGTAAC <u>CATATGGCTGAACTCCGCTGCATGTGTATAAAGACAACCTCT</u>                                                              |
| PKPET-2 (f)    | TATAGGATCCTCAAGATTCATCACCTGCCAATTTTTTCTG                                                                               |
